# Supplementary material for: Serum amyloid A–containing HDL binds adipocyte-derived versican and macrophage-derived biglycan, reducing its antiinflammatory properties
Source: JCI journal article supplement (doi:10.1172/jci.insight.142635), 2020-09-24
Supplement: sd1 [file 1]

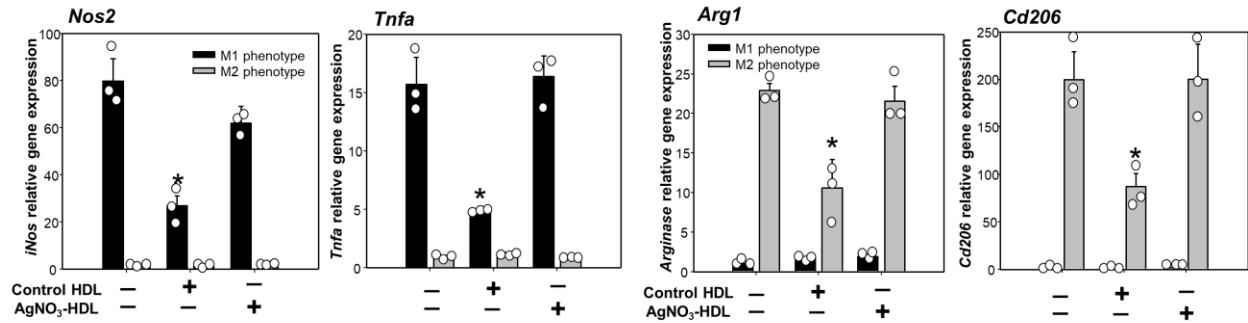

**Supplemental Figure I. Control HDL blocks the differentiation of bone marrow-derived macrophages into M1 and M2 type, while HDL isolated from AgNO<sub>3</sub>-injected mice does not.** Bone marrow-derived macrophages were isolated and pre-exposed with HDL from PBS- or AgNO<sub>3</sub>-injected C57BL/6 mice for 6 hours prior to differentiation to M1 or M2 types as described in methods. After differentiation, *Nos2* and *Tnfa* gene expression (**A**), markers for M1 type, and *Arg1* and *Cd206* gene expression (**B**), markers for M2, were measured by RT-PCR. Data are representative of 3 independent experiments (n=3) with mean ± SEM. \*p < 0.001 vs. AgNO<sub>3</sub>-HDL. ANOVA and Bonferroni post-hoc test.
